# Supplementary material for: Induction immune-checkpoint inhibitors for resectable oncogene-mutant NSCLC: A multicenter pooled analysis
Source: PubMed Central journal article supplement (PMC9485257; doi:10.1038/s41698-022-00301-8), 2022-09-19
Supplement: 41698_2022_301_MOESM2_ESM.pdf [file 41698_2022_301_MOESM2_ESM.pdf]

1 Supplementary Table 1. Corresponding molecular features, AEs profile and  
 2 physicians' considerations for neoadjuvant immunotherapy.

| Patient | Histology             | cTNM                  | Molecular feature                                                           | Detective Method | Regimens                    | Reasons for NeoIO                                            | AE profile during NeoTx                                                                                                                      |
|---------|-----------------------|-----------------------|-----------------------------------------------------------------------------|------------------|-----------------------------|--------------------------------------------------------------|----------------------------------------------------------------------------------------------------------------------------------------------|
| 1       | LUAD                  | cT4N0M0 (stage IIIA)  | EGFR exon17-25 insertion                                                    | NGS              | Pembrolizumab+AP (2 cycles) | Preoperative PCR/IHC negative                                | NR                                                                                                                                           |
| 2       | LUAD                  | cT3N0M0 (stage IIB)   | EGFR exon19del                                                              | PCR              | Pembrolizumab+AP (2 cycles) | Inadequate biopsy samples for NGS                            | grade 1 nausea ; grade 1 neutrophil count decreased; grade 1 white blood cell decreased                                                      |
| 3       | LUAD                  | cT2aN0M (stage IIA)   | ALK rearrangement                                                           | IHC              | Nivolumab+AP (2 cycles)     | Inadequate biopsy samples for NGS                            | NA                                                                                                                                           |
| 4       | LUAD                  | cT3N0M0 (stage IIB)   | HER2 exon20 insertion                                                       | PCR              | Toripalimab+AP (3 cycles)   | Inadequate biopsy samples for NGS, ctDNA negative            | grade 1 constipation ; grade 2 white blood cell decreased; grade 1 neutrophil count decreased; grade 1 anemia ; grade 1 creatinine increased |
| 5       | LUAD                  | cT2bN0M0 (stage IIA)  | EGFR exon21L858R                                                            | NGS              | Nivolumab+PC (3 cycles)     | Inadequate biopsy samples for NGS, ctDNA negative            | grade 1 chest pain                                                                                                                           |
| 6       | LUAD                  | cT2aN2M0 (stage IIIA) | EGFR exon20 insertion/TP53/CD274 Amp                                        | NGS              | Camrelizumab+PC (3 cycles)  | No approved corresponding TKI, high PD-L1                    | grade 3 anemia ;                                                                                                                             |
| 7       | LUAD                  | cT1bN2M0 (stage IIIA) | KRAS G12D/SETD2/CREBBP/SMAD4                                                | NGS              | Pembrolizumab (2 cycles)    | NA                                                           | grade 2 rash acneiform ; grade 1 diarrhea grade 2 alanine aminotransferase increased;                                                        |
| 8       | LUAD                  | cT4N0M0 (stage IIIA)  | KRAS G12D                                                                   | NGS              | Nivolumab+PC (4 cycles)     | NA                                                           | grade 2 alopecia; grade 2 rash acneiform; grade 2 hyperthyroidism grade1 diarrhea; grade 2 lymphocyte count                                  |
| 9       | LUAD                  | cT4N1M0 (stage IIIA)  | RET-CEP170/NTRK3_G727                                                       | NGS              | Nivolumab+PC (3 cycles)     | No approved corresponding TKI                                | decreased; grade 1 white blood cell decreased grade 1 abdominal pain;                                                                        |
| 10      | LUAD                  | cT2aN2M0 (stage IIIA) | LOC105376360-RET/TP53/BRCA2                                                 | NGS              | Camrelizumab (3 cycles)     | No approved corresponding TKI, high PD-L1                    | grade 1 rash acneiform; grade 1 reactive cutaneous capillary endothelial proliferation                                                       |
| 11      | Pleomorphic carcinoma | cT1cN2M0 (stage IIIA) | EGFR exon20in/CDKN2A copy number loss/TP53 /BRCA1/BRD4 /PARP1 /RAD50 /VEGFA | NGS              | Nivolumab+PC (3 cycles)     | No approved corresponding TKI                                | grade 3 anemia                                                                                                                               |
| 12      | LUAD                  | cT1bN2M0 (stage IIIA) | RET/CTNNB1/LRP1B/PTEN loss/ERBB3/TP53                                       | NGS              | Nivolumab+PC (3 cycles)     | No approved corresponding TKI                                | grade 2 neutrophil count decreased                                                                                                           |
| 13      | LUAD                  | cT3N0M0 (stage IIB)   | KRAS G12D/TP53/MSH2                                                         | NGS              | Pembrolizumab+AP (3 cycles) | NA                                                           | grade 1 lymphocyte count decreased ;                                                                                                         |
| 14      | LUAD                  | cT1cN2M0 (stage IIIA) | EGFR exon21/KRAS G13D                                                       | NGS              | Pembrolizumab (4 cycles)    | Multiple primary lung cancer and wild type for biopsy sample | grade 2 dry skin                                                                                                                             |
| 15      | LUAD                  | cT2bN0M0 (stage IIA)  | EGFR exon19del/CCNE1/DLL3/KMT2A/AXL/NOTCH2/TP53                             | NGS              | Nivolumab+PC (3 cycles)     | Multiple co-occurring mutational background                  | grade 2 alopecia ; grade 1 nausea                                                                                                            |
| 16      | LUAD                  | cT1bN3M0 (stage IIIC) | BRAF V600E                                                                  | NGS              | Sintilimab+AP (4 cycles)    | No approved corresponding TKI                                | NA                                                                                                                                           |
| 17      | LUAD                  | cT3N0M0 (stage IIB)   | KRAS G12C/TP53/FGFR2/NTRK1 fusion/MET/NTRK3                                 | NGS              | Camrelizumab+AP (4 cycles)  | NTRK fusion along with KRAS G12C                             | grade 1 rash acneiform                                                                                                                       |
| 18      | LUAD                  | cT1bN1M0 (stage IIB)  | KRAS G12V                                                                   | NGS              | Nivolumab+PP (3 cycles)     | NA                                                           | anemia grade 2                                                                                                                               |
| 19      | LUAD                  | cT1cN2M0 (stage IIIA) | KRAS G12D                                                                   | NGS              | Nivolumab+PC (2 cycles)     | NA                                                           | NR                                                                                                                                           |
| 20      | LUAD                  | cT3N1M0 (stage IIIA)  | KRAS exon2                                                                  | PCR              | Nivolumab+PC (2 cycles)     | NA                                                           | alanine aminotransferase increased grade 1                                                                                                   |
| 21      | LUAD                  | cT3N0M0 (stage IIB)   | KRAS G12C                                                                   | NGS              | Nivolumab+PC (3 cycles)     | NA                                                           | NR                                                                                                                                           |
| 22      | LUAD                  | cT4N0M1b (stage IVB)  | HER2 Exon20ins                                                              | PCR              | Sintilimab+AP (3 cycles)    | No approved corresponding TKI, high PD-L1                    | alanine aminotransferase increased grade 2 ;                                                                                                 |

|    |      |                       |                               |     |                             |                                                                                     |                                                                |
|----|------|-----------------------|-------------------------------|-----|-----------------------------|-------------------------------------------------------------------------------------|----------------------------------------------------------------|
| 23 | LUAD | cT3N0M0 (stage IIB)   | EGFR-L858R                    | NGS | Sintilimab+PC (2 cycles)    | NGS performed after surgery                                                         | NR                                                             |
| 24 | LUAD | cT3N1M0 (stage IIIA)  | EGFR-19del                    | NGS | Sintilimab+PC (2 cycles)    | NGS performed after surgery                                                         | NR                                                             |
| 25 | LUAD | cT3N1M0 (stage IIIA)  | CD74-ROS1fusion               | NGS | Sintilimab+PC (2 cycles)    | NGS performed after surgery                                                         | NR                                                             |
| 26 | LUSC | cT4N1M0 (stage IIIA)  | EGFR-L858R                    | NGS | Sintilimab+PC (2 cycles)    | NGS performed after surgery                                                         | NR                                                             |
| 27 | LUAD | cT3N1M0 (stage IIIA)  | EGFR-L858R                    | NGS | Sintilimab+PC (2 cycles)    | NGS performed after surgery                                                         | NR                                                             |
| 28 | LUAD | cT4N0M0 (stage IIIA)  | EGFR exon21 L858R/L861Q       | PCR | Camrelizumab+PC (3 cycles)  | Neoadjuvant treatment was performed before PCR result                               | grade 1 reactive cutaneous capillary endothelial proliferation |
| 29 | LUAD | cT4N2M0 (stage IIIB)  | KRAS G12C                     | NGS | Nivolumab+AP (3 cycles)     | NA                                                                                  | NR                                                             |
| 30 | LUAD | cT3N2M0 (stage IIIB)  | EGFR exon21 L858R             | PCR | Sintilimab+AP (3 cycles)    | Neoadjuvant treatment was performed before PCR result                               | grade 1 rash acneiform; grade 1 white blood cell decreased     |
| 31 | LCC  | cT3N2M0 (stage IIIB)  | ALK fusion (IHC)              | IHC | Pembrolizumab+PC (2 cycles) | Inadequate biopsy samples for NGS                                                   | NA                                                             |
| 32 | LUAD | cT2bN2M0 (stage IIIA) | EGFR                          | NGS | Nivolumab+AP (2 cycles)     | Neoadjuvant treatment was performed before NGS result                               | NR                                                             |
| 33 | LUAD | cT2bN0M0 (stage IIA)  | EGFR exon20ins                | NGS | Sintilimab+PC (2 cycles)    | Inadequate biopsy samples for NGS                                                   | NR                                                             |
| 34 | LUAD | cT3N1M0 (stage IIIA)  | EGFR-L858R                    | NGS | Sintilimab+PC (2 cycles)    | Inadequate biopsy samples for NGS                                                   | NR                                                             |
| 35 | LUAD | cT4N0M0 (stage IIIA)  | EGFR exon21 L858R             | NGS | Nivolumab+AP (3 cycles)     | Inadequate biopsy samples for NGS                                                   | grade 1 chest pain                                             |
| 36 | LUAD | cT2bN3M0 (stage IIIB) | HER2 exon20ins                | NGS | Pembrolizumab+PC (3 cycles) | No approved corresponding TKI                                                       | grade 2 Alanine aminotransferase increased                     |
| 37 | LUAD | cT2aN2M0 (stage IIIA) | EGFR exon19ins                | NGS | Nivolumab+AP (3 cycles)     | Unknown efficacy for TKIs                                                           | grade 2 alopecia; grade 2 alanine aminotransferase increased   |
| 38 | LUAD | cT1cN2M0 (stage IIIA) | SDC4-ROS1 fusion/TP53/B2M amp | NGS | Nivolumab+AP (3 cycles)     | Neoadjuvant treatment was performed before NGS result                               | grade 1 alopecia; grade 2 alanine aminotransferase increased   |
| 39 | ASC  | cT4N2M0 (stage IIIB)  | EGFR exon19del                | NGS | Sintilimab+PC (2 cycles)    | Mixed pathological subtypes PD-L1 high expression with suspected squamous component | grade 1 Pruritus; grade 1 vomiting                             |
| 40 | LUAD | cT3N2M0 (stage IIIB)  | EGFR exon19del                | NGS | Sintilimab+PC (2 cycles)    |                                                                                     | grade 1 alopecia; grade 1 nausea;                              |

1 LUAD, lung adenocarcinoma; LUSC, lung squamous cell carcinoma; ASC,  
2 adenosquamous carcinoma; LCC, large cell carcinoma; NA, not applicable;  
3 NR, not reported.

4  
5  
6  
7  
8  
9  
10  
11  
12  
13

1 **Supplementary Figure 1. Disease-free survival (DFS) of all patients and**  
 2 **EGFR-mutant patients regarding MPR status.**

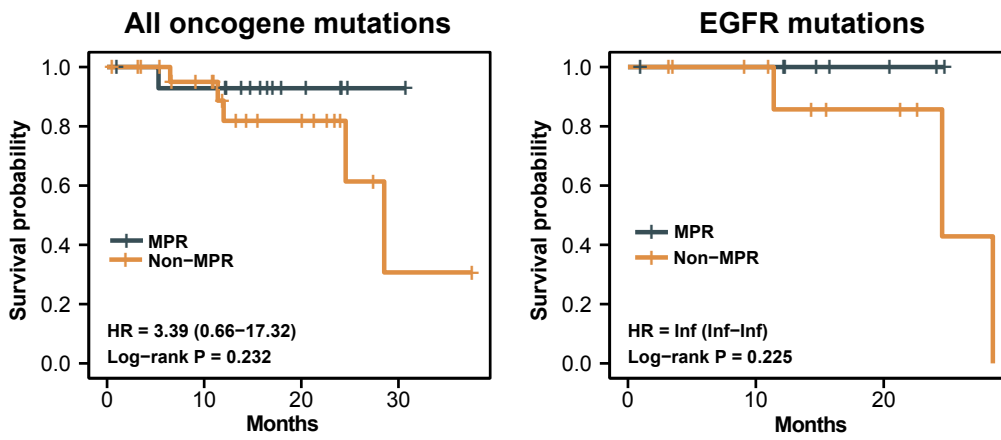

3  
4  
5  
6  
7

8 **Supplementary Figure 2. Indirect comparison of major pathological**  
 9 **response and complete pathological response between neoadjuvant**  
 10 **immunotherapy plus chemotherapy and neoadjuvant erlotinib.**

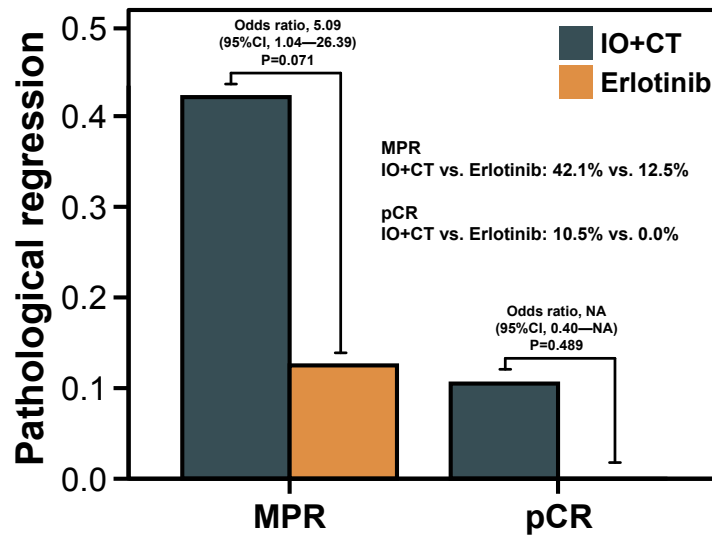

11  
12  
13  
14  
15  
16  
17  
18  
19

1 **Supplementary Figure 3. Hypothesized mode of neoadjuvant**  
 2 **immunotherapy in optimizing whole-course management for oncogene-**  
 3 **mutant localized NSCLC.**

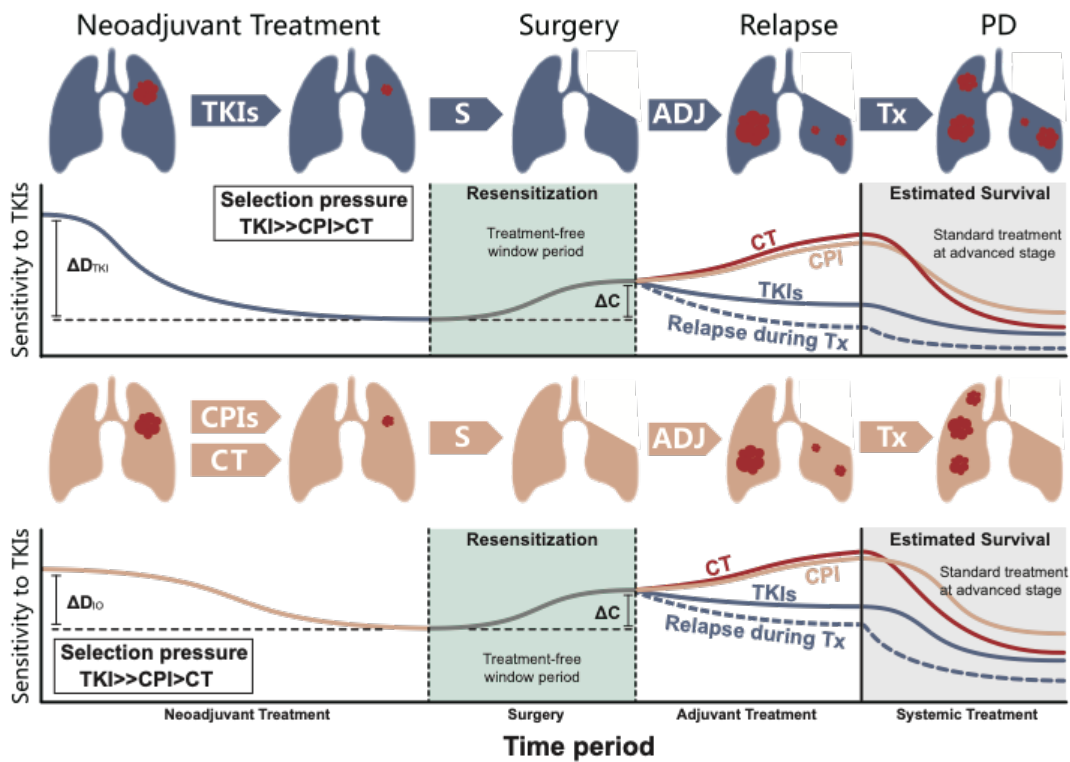

4  
 5 Ordinate represents sensitivity to corresponding TKIs and abscissa  
 6 represents different time period starting from localized NSCLC.  $\Delta D_{TKI}$  and  
 7  $\Delta D_{IO}$  represents decreased sensitivity to TKIs after TKI and immunotherapy  
 8 treatment, respectively.  $\Delta C$  represents increased sensitivity to TKIs during  
 9 treatment-free period. Survival curves during systemic treatment are based on  
 10 standard treatment and not limited to single treatment modality.  
 11  
 12
